# Supplementary material for: COVID-19 Vaccination Status and Hesitancy among Breast Cancer Patients after Two Years of Pandemic: A Cross-Sectional Survey
Source: MDPI journal article supplement (doi:10.3390/vaccines10091530), 2022-09-15
Supplement: s1 [file s1]

**Table S1:** Scale of vaccine hesitancy.

| Score                           |                                                                                                                      | 1                 | 2        | 3       | 4     | 5              |
|---------------------------------|----------------------------------------------------------------------------------------------------------------------|-------------------|----------|---------|-------|----------------|
|                                 |                                                                                                                      | Strongly disagree | Disagree | Neutral | Agree | Strongly agree |
| <b>Perceived susceptibility</b> | 1. I believe that breast cancer patients are more likely to be infected with COVID-19 than healthy people currently. |                   |          |         |       |                |
|                                 | 2. I think there is a possibility of being infected with COVID-19 currently.                                         |                   |          |         |       |                |
|                                 | 3. I worry about the likelihood of being infected with COVID-19                                                      |                   |          |         |       |                |
| <b>Perceived severity</b>       | 4. COVID-19 will cause serious damage to my health                                                                   |                   |          |         |       |                |
|                                 | 5. The complications of COVID-19 are very serious                                                                    |                   |          |         |       |                |
|                                 | 6. COVID-19 infection is more serious than breast cancer                                                             |                   |          |         |       |                |
|                                 | 7. Breast cancer patients infected with COVID-19 are more severely affected than the rest of the population          |                   |          |         |       |                |
| <b>Perceived benefits</b>       | 8. Vaccination makes me less worried about COVID-19 infection                                                        |                   |          |         |       |                |
|                                 | 9. Vaccination reduces my chance of being infected COVID-19 infection                                                |                   |          |         |       |                |
|                                 | 10. Vaccine can prevent COVID-19 complications                                                                       |                   |          |         |       |                |
| <b>Perceived barrier</b>        | 11. I worry that the side effects of the vaccine will interrupt my normal life activities.                           |                   |          |         |       |                |
|                                 | 12. I am concerned about the safety of the COVID-19 vaccine                                                          |                   |          |         |       |                |
|                                 | 13. I am concerned about the effectiveness of the COVID-19 vaccine                                                   |                   |          |         |       |                |
|                                 | 14. I worry that the vaccination will worsen my cancer condition                                                     |                   |          |         |       |                |
|                                 | 15. I think vaccination may interrupt the effectiveness of cancer treatment                                          |                   |          |         |       |                |
| <b>Cues to action</b>           | 16. I'm willing to receive the COVID-19 vaccine if my doctor recommends it                                           |                   |          |         |       |                |
|                                 | 17. I'm willing to receive the COVID-19 vaccine if the media recommends it                                           |                   |          |         |       |                |
|                                 | 18. I'm willing to receive the COVID-19 vaccine if my family, friends and peers recommend it                         |                   |          |         |       |                |

**Table S2. Status of COVID-19 Vaccines within WHO EUL/PQ evaluation process (update on 07 July 2022)<sup>1</sup>**

| Manufacturer                                                                                                                                   | Name of Vaccine                                       | NRA of Record | Platform                                                         | EOI accepted | Pre-submission meeting held                        | Dossier accepted for review         | Status of assessment                                         | Decision date                     |
|------------------------------------------------------------------------------------------------------------------------------------------------|-------------------------------------------------------|---------------|------------------------------------------------------------------|--------------|----------------------------------------------------|-------------------------------------|--------------------------------------------------------------|-----------------------------------|
| 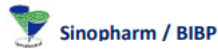<br>Beijing Institute of Biological Products Co., Ltd. (BIBP) | SARS-CoV-2 Vaccine (Vero Cell), Inactivated (InCoV)   | NMPA          | Inactivated, produced in Vero cells                              | √            | √                                                  | √                                   | Finalized 2 and 5 dose presentation (new manufacturing site) | 07 May 2021<br>28 December 2021   |
| <br>Sinovac Life Sciences Co., Ltd.                           | COVID-19 Vaccine (Vero Cell), Inactivated/ Coronavac™ | NMPA          | Inactivated, produced in Vero cells                              | √            | √                                                  | √                                   | Finalized 2 dose presentation                                | 01 June 2021<br>30 September 2021 |
| <br>CanSinoBio                                                | Ad5-nCoV                                              | NMPA          | Recombinant Novel Coronavirus Vaccine (Adenovirus Type 5 Vector) | √            | √                                                  | Rolling data started 09 August 2021 | Finalized                                                    | 19 May 2022                       |
| <br>Wuhan Institute of Biological Products Co., Ltd. (WIBP)   | Inactivated SARS-CoV-2 Vaccine (Vero Cell)            | NMPA          | Inactivated, produced in Vero cells                              | √            | √                                                  | Rolling data started 23 July 2021   | Ongoing                                                      | To be confirmed                   |
| Zhifei Longcom, China                                                                                                                          | Recombinant Novel Coronavirus Vaccine (CHO Cell)      | NMPA          | Recombinant protein subunit                                      | √            | 2 Pre-submission meeting held on 1 and 21 Dec 2021 | Rolling data started 28 March 2022  | Ongoing                                                      | To be confirmed                   |

NRA: National Regulatory Authorities

NMPA: National Medical Products Administration

<sup>1</sup> Status of COVID-19 Vaccines within WHO EUL/PQ evaluation process. [https://extranet.who.int/pqweb/sites/default/files/documents/Status\\_COVID\\_VAX\\_07July2022.pdf](https://extranet.who.int/pqweb/sites/default/files/documents/Status_COVID_VAX_07July2022.pdf) (update on **07 July 2022**).
